## Rapamycin for the aging skin

Mikhail V. Blagosklonny

In 2007, I filed a patent application claiming that topical rapamycin (e.g., in the form of a cream or ointment) <https://patents.google.com/patent/WO2008022256A2/en> could be used to prevent and treat skin aging. Potential indications include various types of age-related spots, wrinkles, photo-aged skin, and other age-related skin conditions. The patent was not granted, nor were cosmetic companies interested in pursuing this avenue of product development. Cell senescence has traditionally been seen as growth arrest. It seemed weird that rapamycin, a drug that inhibits growth, could inhibit cellular senescence. Nonetheless, it works because, actually, senescence is a continuation of growth when true growth is impossible [1]; in other words, senescence is “twisted” growth [2]. In an exciting ‘twist’, these claims were recently confirmed in a clinical trial by Chung et al. [3], which I will discuss later.

Even in 2007, the idea of using rapamycin topically was not novel [4, 5]. (What was novel in my application was the idea of using topical rapamycin as an anti-aging drug for the aging skin [1]). By now, there have been dozens of papers describing the therapeutic use of rapamycin (Sirolimus) in patients with such skin diseases as lymphatic malformations, vascular anomalies, Facial Angiofibroma and psoriasis [6-13]. These diseases were treated in children and young adults. In one study, topical rapamycin at low doses (0.003-0.015%) decreased facial angiofibromas in young adults. There was no systemic absorption of rapamycin (blood levels were <1.0 ng/mL) [13].

Returning to cellular senescence, signaling in the mTOR (Target of Rapamycin) pathway drives growth of cellular mass and sustains cell cycle progression. Cells grow and divide, balancing growth. But when the cell cycle is suddenly blocked by p16 or p21, mTOR drives growth-like conversion from reversible arrest (quiescence) to senescence [2, 14]. In short, mTOR drives geroconversion [15]. Rapamycin and its analogs, as well as pan-mTOR inhibitors, suppress geroconversion, thereby maintaining cells in a young healthy state. Moreover, these drugs prevent loss of cells’ proliferative potential, which is considered a strict definition of senescence [2, 15]. Geroconversion in stem cells leads to stem cells depletion [16, 17]. mTOR-driven hypertrophy can be followed by atrophy at the end stages. Cellular hyperfunction eventually leads to cellular exhaustion and secondary functional decline [1].

Suppression of cellular senescence by rapamycin was demonstrated in numerous studies both in vivo and in vitro [18-30] and see for references [15]. In vitro, rapamycin slows conversion to senescence by approximately 3-fold [14]; it does not suppress it completely. Notably in that regard, in the most rapamycin-responsive mouse model of mitochondrial disease, rapamycin extends the maximum life span by nearly 3-fold [31].

Just as *in vitro* geroconversion is a continuation of growth, organismal aging is an unintended and harmful continuation of developmental growth post-development [1, 32]. These messy quasi-programs inevitably lead to age-related diseases, which include conditions ranging from obesity, cancer and Alzheimer’s disease to skin spots, wrinkles and seborrheic keratoses. mTOR drives geroconversion, increasing cellular functionality (e.g., the senescence-associated secretory phenotype). It is noteworthy that this increase in cellular activity can cause secondary exhaustion, tissue damage and decreased organ function; for example, hypertrophy may be followed by atrophy at later stages. In other words, age-related diseases and conditions initially caused by mTOR-driven hyperfunction eventually lead to organ damage and functional decline [1, 33]. Similar quasi-programs were described even in the worm [34-36]. In sum, aging is an unintentional and harmful continuation of developmental programs, driven in part by mTOR. To be clear, mTOR activity does not need to increase with age, just keeping it at a level as high as during development is sufficient to cause disease. Despite its simplicity, this model accurately predicts that rapamycin will extend life and delay diseases. Indeed, since initial publications [18, 37, 38, 39], numerous studies have confirmed that rapamycin extends lifespan in mice (see for references [40-44]).

In that context, it is predictable that rapamycin would slow skin aging. However, unless rapamycin reverses skin aging, not merely slow it, the effect would be difficult to document. This is because a patient cannot serve as a self-control (placebo control) unless rapamycin reverses aging, which would be easy to detect. This difficulty can be overcome, however, by comparing an untreated hand with a hand treated with topically applied rapamycin in the same subject. This is the approach taken by Chung et al. in their study, which found that treatment with rapamycin-containing cream

improved skin photoaging and skin tone, decreased fine wrinkles, increased dermal volume, and reduced sagging of the skin [3]. These differences between treated and untreated hands were detectable after 4 months of the treatment [3]. Regrettably, the study excluded patients with diabetes, although the therapeutic effect would probably be more significant in diabetic patients, given that mTOR is overactivated in that disease. In addition, it is unclear whether rapamycin reversed skin aging and improved the skin or merely slowed the progression of skin aging. In the latter scenario, the difference between the treated and untreated hands is due to the progression of aging in the untreated hands. In combination with placebo/treatment, comparisons of specific abnormalities before and after treatment is also needed. Despite these open questions the study is remarkable [3].

As a cosmetic, rapamycin-containing cream may be applied to selected areas, like the hands and face, especially skin affected by age-related spots and pathologies. It should not be applied to the entire skin surface of the body. To affect the entire skin surface, systemic use of rapamycin would likely be a better option, as many manifestations of skin aging are probably due to systemic organismal aging and disease; skin aging is not an exclusively local process. And most importantly, systemic rapamycin use increases lifespan and decreases disease. This by itself is so important that solely topical use of rapamycin may seem insufficient. On the other hand, topical application of any drug is safer than systemic administration. Still, the best strategy in some cases may be simultaneous systemic and topical use of rapamycin in selected areas of the skin, especially areas where there are signs of aging marks. However, given that most doctors are fearful of systemic treatment with rapamycin [45], I expect that it will be topical use of rapamycin that becomes widespread, if regulatory hurdles can be overcome. Whether rapamycin cream should be a prescription treatment or an over-the-counter cosmetic will likely be a matter of debate.

## REFERENCES

- Blagosklonny MV. Aging and immortality: quasi-programmed senescence and its pharmacologic inhibition. *Cell Cycle*. 2006; 5:2087–102. <https://doi.org/10.4161/cc.5.18.3288> PMID:17012837
- Demidenko ZN, Blagosklonny MV. Growth stimulation leads to cellular senescence when the cell cycle is blocked. *Cell Cycle*. 2008; 7:3355–61. <https://doi.org/10.4161/cc.7.21.6919> PMID:18948731
- Chung CL, Lawrence I, Hoffman M, Elgindi D, Nadhan K, Potnis M, Jin A, Sershon C, Binnebose R, Lorenzini A, Sell C. Topical rapamycin reduces markers of senescence and aging in human skin: an exploratory, prospective, randomized trial. *Geroscience*. 2019; 41:861–69. <https://doi.org/10.1007/s11357-019-00113-y> PMID:31761958
- Meingassner JG, Stütz A. Immunosuppressive macrolides of the type FK 506: a novel class of topical agents for treatment of skin diseases? *J Invest Dermatol*. 1992; 98:851–55. <https://doi.org/10.1111/1523-1747.ep12456939> PMID:1375617
- Ormerod AD, Shah SA, Copeland P, Omar G, Winfield A. Treatment of psoriasis with topical sirolimus: preclinical development and a randomized, double-blind trial. *Br J Dermatol*. 2005; 152:758–64. <https://doi.org/10.1111/j.1365-2133.2005.06438.x> PMID:15840110
- Sandbank S, Molho-Pessach V, Farkas A, Barzilai A, Greenberger S. Oral and Topical Sirolimus for Vascular Anomalies: A Multicentre Study and Review. *Acta Derm Venereol*. 2019; 99:990–96. <https://doi.org/10.2340/00015555-3262> PMID:31304557
- Wataya-Kaneda M, Nakamura A, Tanaka M, Hayashi M, Matsumoto S, Yamamoto K, Katayama I. Efficacy and Safety of Topical Sirolimus Therapy for Facial Angiofibromas in the Tuberous Sclerosis Complex : A Randomized Clinical Trial. *JAMA Dermatol*. 2017; 153:39–48. <https://doi.org/10.1001/jamadermatol.2016.3545> PMID:27837201
- García-Montero P, Del Boz J, Sanchez-Martínez M, Escudero Santos IM, Baselga E. Microcystic Lymphatic Malformation Successfully Treated With Topical Rapamycin. *Pediatrics*. 2017; 139:e20162105. <https://doi.org/10.1542/peds.2016-2105> PMID:28557723
- Tanaka M, Wataya-Kaneda M, Nakamura A, Matsumoto S, Katayama I. First left-right comparative study of topical rapamycin vs. vehicle for facial angiofibromas in patients with tuberous sclerosis complex. *Br J Dermatol*. 2013; 169:1314–18. <https://doi.org/10.1111/bjd.12567> PMID:23909960
- Wheless JW, Almoazen H. A novel topical rapamycin cream for the treatment of facial angiofibromas in tuberous sclerosis complex. *J Child Neurol*. 2013; 28:933–36. <https://doi.org/10.1177/0883073813488664> PMID:23680945

11. Koenig MK, Bell CS, Hebert AA, Roberson J, Samuels JA, Slopis JM, Tate P, Northrup H, Collaborators TT, and TREATMENT Trial Collaborators. Efficacy and Safety of Topical Rapamycin in Patients With Facial Angiofibromas Secondary to Tuberous Sclerosis Complex: The TREATMENT Randomized Clinical Trial. *JAMA Dermatol.* 2018; 154:773–80. <https://doi.org/10.1001/jamadermatol.2018.0464> PMID:29800048
12. Truchuelo T, Díaz-Ley B, Ríos L, Alcántara J, Jaén P. Facial angiofibromas treated with topical rapamycin: an excellent choice with fast response. *Dermatol Online J.* 2012; 18:15. PMID:22301052
13. Koenig MK, Hebert AA, Roberson J, Samuels J, Slopis J, Woerner A, Northrup H. Topical rapamycin therapy to alleviate the cutaneous manifestations of tuberous sclerosis complex: a double-blind, randomized, controlled trial to evaluate the safety and efficacy of topically applied rapamycin. *Drugs R D.* 2012; 12:121–26. <https://doi.org/10.2165/11634580-000000000-00000> PMID:22934754
14. Demidenko ZN, Zubova SG, Bukreeva EI, Pospelov VA, Pospelova TV, Blagosklonny MV. Rapamycin decelerates cellular senescence. *Cell Cycle.* 2009; 8:1888–95. <https://doi.org/10.4161/cc.8.12.8606> PMID:19471117
15. Blagosklonny MV. Rapamycin, proliferation and geroconversion to senescence. *Cell Cycle.* 2018; 17:2655–65. <https://doi.org/10.1080/15384101.2018.1554781> PMID:30541374
16. Sousa-Victor P, García-Prat L, Muñoz-Cánoves P. Dual mTORC1/C2 inhibitors: gerosuppressors with potential anti-aging effect. *Oncotarget.* 2015; 6:23052–54. <https://doi.org/10.18632/oncotarget.5563> PMID:26375366
17. Sousa-Victor P, Perdiguero E, Muñoz-Cánoves P. Geroconversion of aged muscle stem cells under regenerative pressure. *Cell Cycle.* 2014; 13:3183–90. <https://doi.org/10.4161/15384101.2014.965072> PMID:25485497
18. Chen C, Liu Y, Liu Y, Zheng P. mTOR regulation and therapeutic rejuvenation of aging hematopoietic stem cells. *Sci Signal.* 2009; 2:ra75. <https://doi.org/10.1126/scisignal.2000559> PMID:19934433
19. Iglesias-Bartolome R, Patel V, Cotrim A, Leelahavanichkul K, Molinolo AA, Mitchell JB, Gutkind JS. mTOR inhibition prevents epithelial stem cell senescence and protects from radiation-induced mucositis. *Cell Stem Cell.* 2012; 11:401–14. <https://doi.org/10.1016/j.stem.2012.06.007> PMID:22958932
20. Wang R, Yu Z, Sunchu B, Shoaf J, Dang I, Zhao S, Caples K, Bradley L, Beaver LM, Ho E, Löhr CV, Perez VI. Rapamycin inhibits the secretory phenotype of senescent cells by a Nrf2-independent mechanism. *Aging Cell.* 2017; 16:564–74. <https://doi.org/10.1111/acer.12587> PMID:28371119
21. Herranz N, Gallage S, Mellone M, Wuestefeld T, Klotz S, Hanley CJ, Raguz S, Acosta JC, Innes AJ, Banito A, Georgilis A, Montoya A, Wolter K, et al. mTOR regulates MAPKAPK2 translation to control the senescence-associated secretory phenotype. *Nat Cell Biol.* 2015; 17:1205–17. <https://doi.org/10.1038/ncb3225> PMID:26280535
22. Hinojosa CA, Mgbemena V, Van Roekel S, Austad SN, Miller RA, Bose S, Orihuela CJ. Enteric-delivered rapamycin enhances resistance of aged mice to pneumococcal pneumonia through reduced cellular senescence. *Exp Gerontol.* 2012; 47:958–65. <https://doi.org/10.1016/j.exger.2012.08.013> PMID:22981852
23. Gu Z, Tan W, Ji J, Feng G, Meng Y, Da Z, Guo G, Xia Y, Zhu X, Shi G, Cheng C. Rapamycin reverses the senescent phenotype and improves immunoregulation of mesenchymal stem cells from MRL/lpr mice and systemic lupus erythematosus patients through inhibition of the mTOR signaling pathway. *Aging (Albany NY).* 2016; 8:1102–14. <https://doi.org/10.18632/aging.100925> PMID:27048648
24. Gao C, Ning B, Sang C, Zhang Y. Rapamycin prevents the intervertebral disc degeneration via inhibiting differentiation and senescence of annulus fibrosus cells. *Aging (Albany NY).* 2018; 10:131–43. <https://doi.org/10.18632/aging.101364> PMID:29348392
25. Horvath S, Lu AT, Cohen H, Raj K. Rapamycin retards epigenetic ageing of keratinocytes independently of its effects on replicative senescence, proliferation and differentiation. *Aging (Albany NY).* 2019; 11:3238–49. <https://doi.org/10.18632/aging.101976> PMID:31136303
26. Walters HE, Deneka-Hannemann S, Cox LS. Reversal of phenotypes of cellular senescence by pan-mTOR inhibition. *Aging (Albany NY).* 2016; 8:231–44. <https://doi.org/10.18632/aging.100872> PMID:26851731
27. Laberge RM, Sun Y, Orjalo AV, Patil CK, Freund A,

- Zhou L, Curran SC, Davalos AR, Wilson-Edell KA, Liu S, Limbad C, Demaria M, Li P, et al. mTOR regulates the pro-tumorigenic senescence-associated secretory phenotype by promoting IL1A translation. *Nat Cell Biol.* 2015; 17:1049–61.  
<https://doi.org/10.1038/ncb3195> PMID:26147250
28. Christy B, Demaria M, Campisi J, Huang J, Jones D, Dodds SG, Williams C, Hubbard G, Livi CB, Gao X, Weintraub S, Curiel T, Sharp ZD, Hasty P. p53 and rapamycin are additive. *Oncotarget.* 2015; 6:15802–13.  
<https://doi.org/10.18632/oncotarget.4602> PMID:26158292
29. Pospelova TV, Bykova TV, Zubova SG, Katolikova NV, Yartzeva NM, Pospelov VA. Rapamycin induces pluripotent genes associated with avoidance of replicative senescence. *Cell Cycle.* 2013; 12:3841–51.  
<https://doi.org/10.4161/cc.27396> PMID:24296616
30. Leontieva OV, Blagosklonny MV. While reinforcing cell cycle arrest, rapamycin and Torins suppress senescence in UVA-irradiated fibroblasts. *Oncotarget.* 2017; 8:109848–56.  
<https://doi.org/10.18632/oncotarget.17827> PMID:29312653
31. Johnson SC, Yanos ME, Kayser EB, Quintana A, Sangesland M, Castanza A, Uhde L, Hui J, Wall VZ, Gagnidze A, Oh K, Wasko BM, Ramos FJ, et al. mTOR inhibition alleviates mitochondrial disease in a mouse model of Leigh syndrome. *Science.* 2013; 342:1524–28.  
<https://doi.org/10.1126/science.1244360> PMID:24231806
32. Blagosklonny MV. TOR-driven aging: speeding car without brakes. *Cell Cycle.* 2009; 8:4055–59.  
<https://doi.org/10.4161/cc.8.24.10310> PMID:19923900
33. Blagosklonny MV. Answering the ultimate question “what is the proximal cause of aging?”. *Aging (Albany NY).* 2012; 4:861–77.  
<https://doi.org/10.18632/aging.100525> PMID:23425777
34. Gems D, de la Guardia Y. Alternative Perspectives on Aging in *Caenorhabditis elegans*: Reactive Oxygen Species or Hyperfunction? *Antioxid Redox Signal.* 2013; 19:321–29.  
<https://doi.org/10.1089/ars.2012.4840> PMID:22870907
35. Wang H, Zhang Z, Gems D. Monsters in the uterus: teratoma-like tumors in senescent *C. elegans* result from a parthenogenetic quasi-program. *Aging (Albany NY).* 2018; 10:1188–89.  
<https://doi.org/10.18632/aging.101486> PMID:29923830
36. Wang H, Zhao Y, Ezcurra M, Benedetto A, Gilliat AF, Hellberg J, Ren Z, Galimov ER, Athigapanich T, Girstmair J, Telford MJ, Dolphin CT, Zhang Z, Gems D. A parthenogenetic quasi-program causes teratoma-like tumors during aging in wild-type *C. elegans*. *NPJ Aging Mech Dis.* 2018; 4:6.  
<https://doi.org/10.1038/s41514-018-0025-3> PMID:29928508
37. Harrison DE, Strong R, Sharp ZD, Nelson JF, Astle CM, Flurkey K, Nadon NL, Wilkinson JE, Frenkel K, Carter CS, Pahor M, Javors MA, Fernandez E, Miller RA. Rapamycin fed late in life extends lifespan in genetically heterogeneous mice. *Nature.* 2009; 460:392–95.  
<https://doi.org/10.1038/nature08221> PMID:19587680
38. Anisimov VN, Zabezhinski MA, Popovich IG, Piskunova TS, Semenchenko AV, Tyndyk ML, Yurova MN, Antoch MP, Blagosklonny MV. Rapamycin extends maximal lifespan in cancer-prone mice. *Am J Pathol.* 2010; 176:2092–97.  
<https://doi.org/10.2353/ajpath.2010.091050> PMID:20363920
39. Miller RA, Harrison DE, Astle CM, Baur JA, Boyd AR, de Cabo R, Fernandez E, Flurkey K, Javors MA, Nelson JF, Orihuela CJ, Pletcher S, Sharp ZD, et al. Rapamycin, but not resveratrol or simvastatin, extends life span of genetically heterogeneous mice. *J Gerontol A Biol Sci Med Sci.* 2011; 66:191–201.  
<https://doi.org/10.1093/gerona/glq178> PMID:20974732
40. Miller RA, Harrison DE, Astle CM, Fernandez E, Flurkey K, Han M, Javors MA, Li X, Nadon NL, Nelson JF, Pletcher S, Salmon AB, Sharp ZD, et al. Rapamycin-mediated lifespan increase in mice is dose and sex dependent and metabolically distinct from dietary restriction. *Aging Cell.* 2014; 13:468–77.  
<https://doi.org/10.1111/acer.12194> PMID:24341993
41. Johnson SC, Kaeberlein M. Rapamycin in aging and disease: maximizing efficacy while minimizing side effects. *Oncotarget.* 2016; 7:44876–78.  
<https://doi.org/10.18632/oncotarget.10381> PMID:27384492
42. Swindell WR. Rapamycin in mice. *Aging (Albany NY).* 2017; 9:1941–42.  
<https://doi.org/10.18632/aging.101289> PMID:28876223
43. Bitto A, Ito TK, Pineda VV, LeTexier NJ, Huang HZ, Sutlief E, Tung H, Vizzini N, Chen B, Smith K, Meza D, Yajima M, Beyer RP, et al. Transient rapamycin treatment can increase lifespan and healthspan in middle-aged mice. *eLife.* 2016; 5:5.

<https://doi.org/10.7554/eLife.16351> PMID:[27549339](https://pubmed.ncbi.nlm.nih.gov/27549339/)

44. Blagosklonny MV. Rapamycin and quasi-programmed aging: four years later. *Cell Cycle*. 2010; 9:1859–62. <https://doi.org/10.4161/cc.9.10.11872> PMID:[20436272](https://pubmed.ncbi.nlm.nih.gov/20436272/)
45. Blagosklonny MV. Rapamycin for longevity: opinion article. *Aging (Albany NY)*. 2019; 11:8048–67. <https://doi.org/10.18632/aging.102355> PMID:[31586989](https://pubmed.ncbi.nlm.nih.gov/31586989/)

**Mikhail V. Blagosklonny:** Cell Stress Biology, Roswell Park Cancer Institute, Elm and Carlton Street, Buffalo, NY 14263 USA

**Correspondence:** Mikhail V. Blagosklonny

**Email:** [blagosklonny@oncotarget.com](mailto:blagosklonny@oncotarget.com)

[blagosklonny@rapalogs.com](mailto:blagosklonny@rapalogs.com)

**Twitter:** @Blagosklonny

**Keywords:** rapamycin, mTOR, cream, topical, anti-aging, cosmetics, patents

**Conflict of Interests:** The author declares no conflicts of interest

**Patent Application Publication:**

<https://patents.google.com/patent/WO2008022256A2/en>

**Copyright:** Blagosklonny. This is an open-access article distributed under the terms of the Creative Commons Attribution License (CC BY 3.0), which permits unrestricted use, distribution, and reproduction in any medium, provided the original author and source are credited

**Received:** December 18, 2019

**Published:** December 27, 2019
